# Supplementary material
Source: MDPI journal article supplement (https://www.mdpi.com/2504-477X/6/11/327)
Supplement: s1 [file s1]

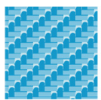

Supplementary Materials

# Application of Rh/TiO<sub>2</sub> Nanotube Array into Photocatalytic Hydrogen Production from Formic Acid Solution

Mahmudul Hassan Suhag <sup>1,2</sup>, Ikki Tateishi <sup>3,\*</sup>, Mai Furukawa <sup>1</sup>, Hideyuki Katsumata <sup>1</sup>, Aklima Khatun <sup>1</sup>, and Satoshi Kaneco <sup>1,\*</sup>

<sup>1</sup> Department of Chemistry for Materials, Graduate School of Engineering, Mie University, Tsu, Mie 514-8507, Japan

<sup>2</sup> Department of Chemistry, University of Barishal, Barishal-8254, Bangladesh.

<sup>3</sup> Environmental Preservation Center, Mie University, Tsu, Mie 514-8507, Japan

\* Correspondence: tateishi@gecer.mie-u.ac.jp (I.T.);  
kaneco@chem.mie-u.ac.jp (S.K.); Tel.: +81-59-231-9427

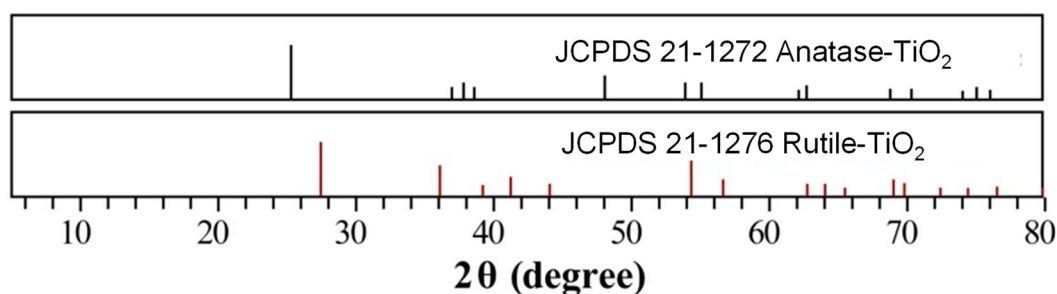

**Figure S1.** Tetragonal anatase phase (JCPDs file no. 21-1272, space group I4<sub>1</sub>/amd) and the tetragonal rutile phase (JCPDs file no. 21-1276, space group P4<sub>2</sub>/mmn) for TiO<sub>2</sub>.
